# Supplementary material for: 5-Hydroxycyclopenicillone, a New β-Amyloid Fibrillization Inhibitor from a Sponge-Derived Fungus Trichoderma sp. HPQJ-34
Source: PubMed Central journal article supplement (PMC5577614; doi:10.3390/md15080260), 2017-08-19
Supplement: marinedrugs-15-00260-s001.pdf [file marinedrugs-15-00260-s001.pdf]

# Supplementary Materials:

## 5-Hydroxycyclopencillone, a New $\beta$ -Amyloid Fibrillization Inhibitor from a Sponge-Derived Fungus *Trichoderma* sp. HPQJ-34

Fang Fang, Jiaying Zhao, Lijian Ding, Chunhui Huang, C. Benjamin Naman, Shan He, Bin Wu, Peng Zhu, Qijun Luo, William H. Gerwick, Xiaojun Yan, Qinwen Wang, Zaijun Zhang and Wei Cui

### List of Supplementary Materials:

- Figure S1.** HRESIMS for compound 1.
- Figure S2.**  $^1\text{H}$  NMR spectrum ( $\text{CD}_3\text{OD}$ , 500 MHz) of compound 1.
- Figure S3.**  $^{13}\text{C}$  NMR spectrum ( $\text{CD}_3\text{OD}$ , 125 MHz) of compound 1.
- Figure S4.** COSY spectrum ( $\text{CD}_3\text{OD}$ , 500 MHz) of compound 1.
- Figure S5.** HSQC spectrum ( $\text{CD}_3\text{OD}$ , 500 MHz  $^1\text{H}$  and 125 MHz  $^{13}\text{C}$ ) of compound 1.
- Figure S6.** HMBC spectrum ( $\text{CD}_3\text{OD}$ , 500 MHz  $^1\text{H}$  and 125 MHz  $^{13}\text{C}$ ) of compound 1.
- Figure S7.** NOESY spectrum ( $\text{CD}_3\text{OD}$ , 500 MHz) of compound 1.
- Text S8.** ITS rDNA gene sequence from strain HPQJ-34.
- Text S9.** Computational molecular model coordinates for an energy minimized conformer of compound 1.
- Text S10.** Computational molecular model coordinates for an energy minimized conformer of compound 5.
- Table S11.** Comparison of the NMR data of compound 1 and 5.

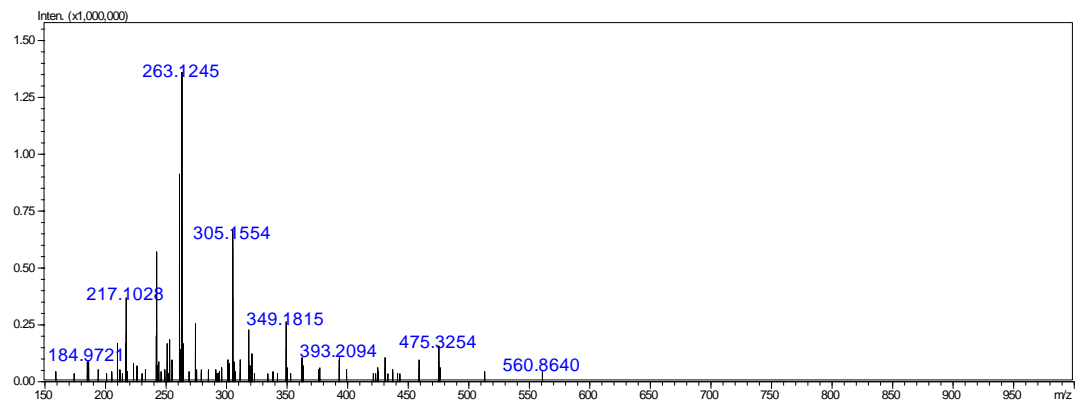

Figure S1. HRESIMS for compound 1.

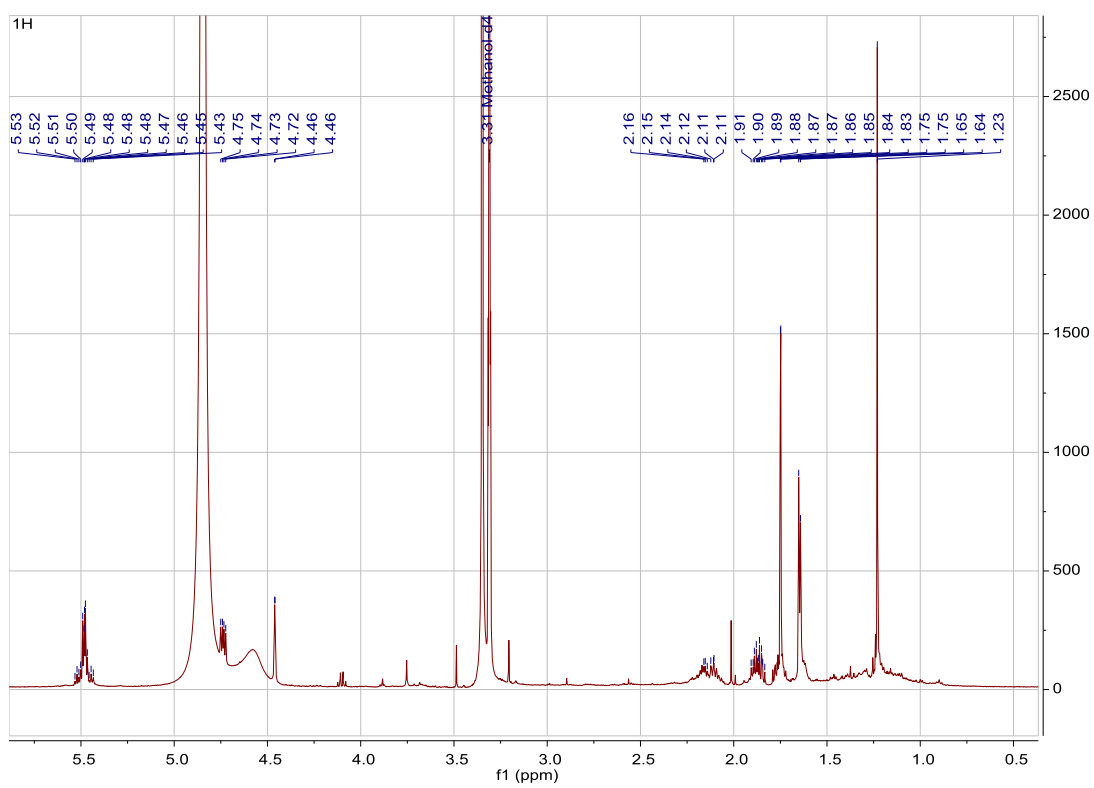

Figure S2. <sup>1</sup>H NMR spectrum (CD<sub>3</sub>OD, 500 MHz) of compound 1.

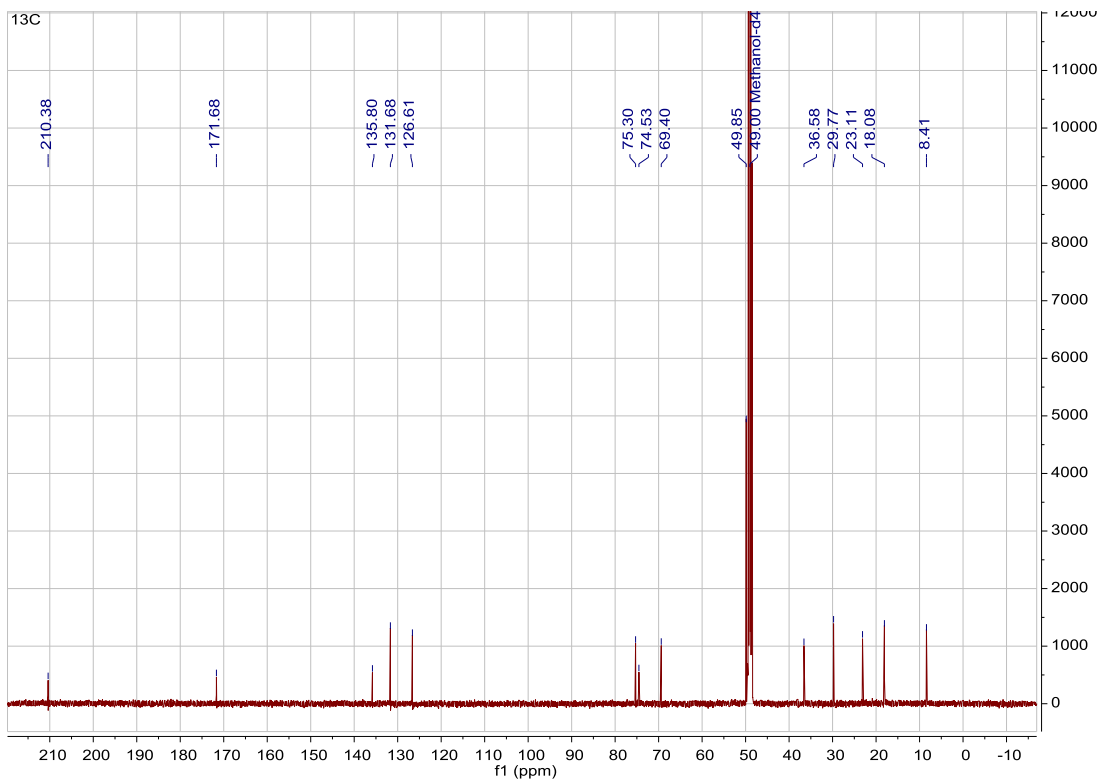

Figure S3. <sup>13</sup>C NMR spectrum (CD<sub>3</sub>OD, 125 MHz) of compound 1.

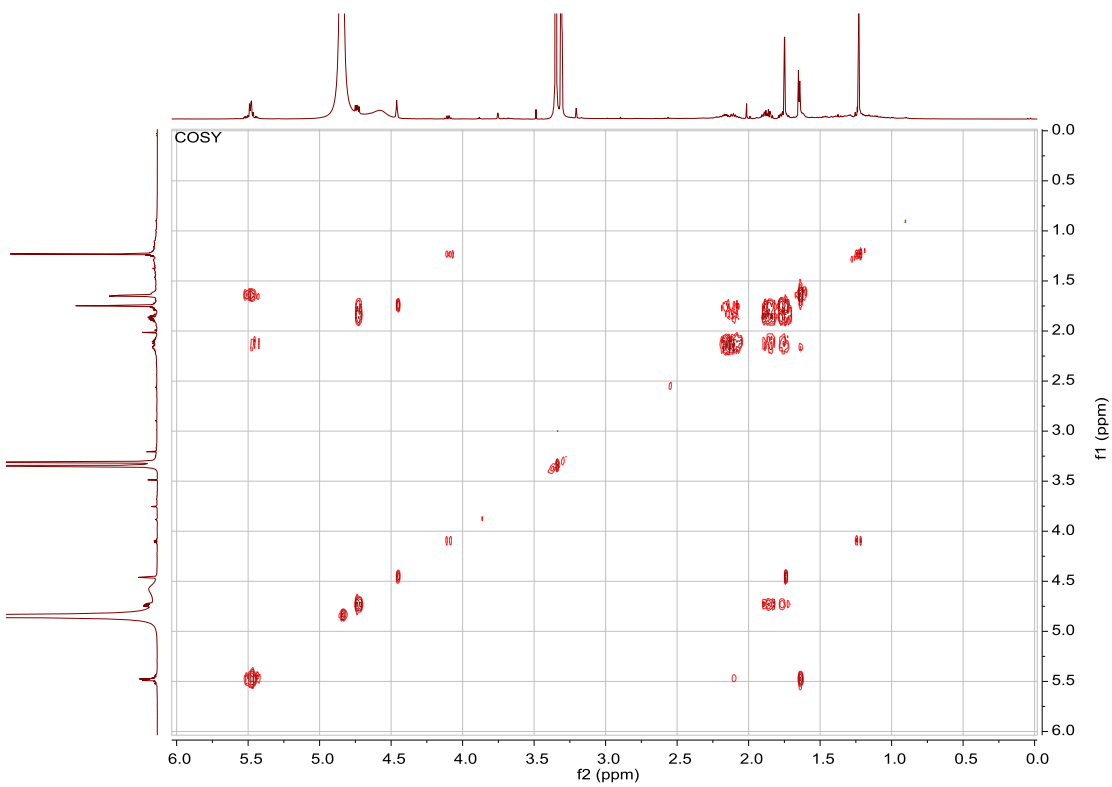

Figure S4. COSY spectrum (CD<sub>3</sub>OD, 500 MHz) of compound 1.

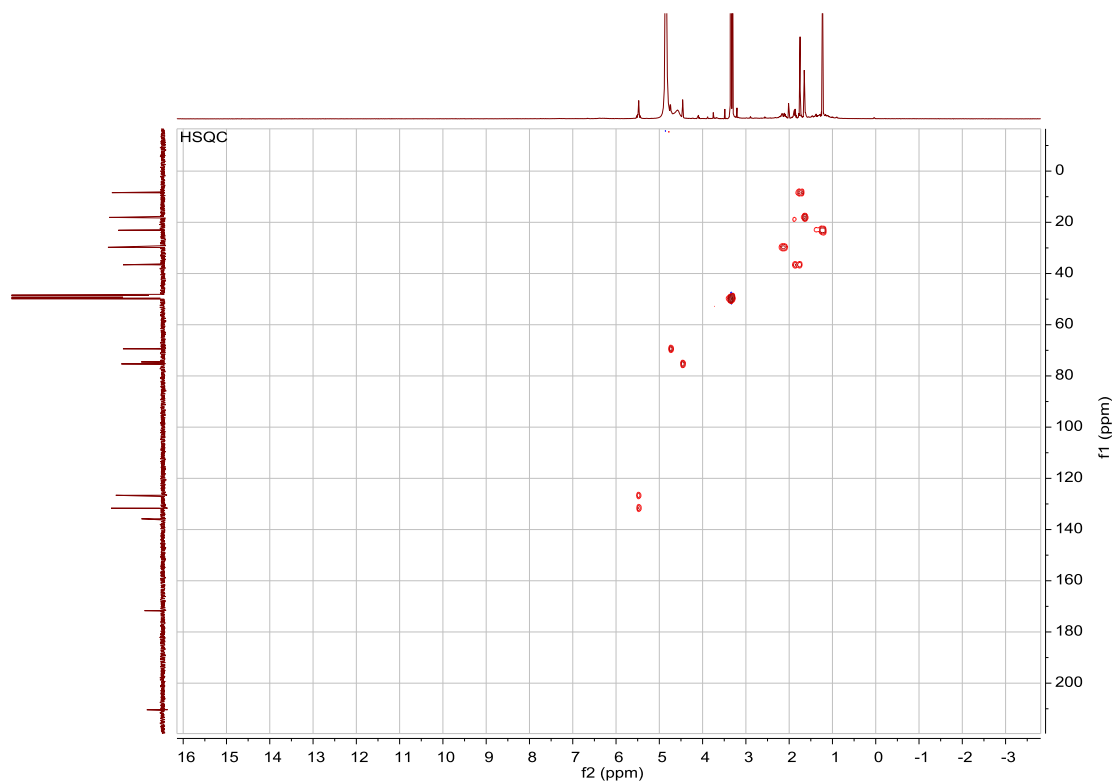

Figure S5. HSQC spectrum (CD<sub>3</sub>OD, 500 MHz <sup>1</sup>H and 125 MHz <sup>13</sup>C) of compound 1.

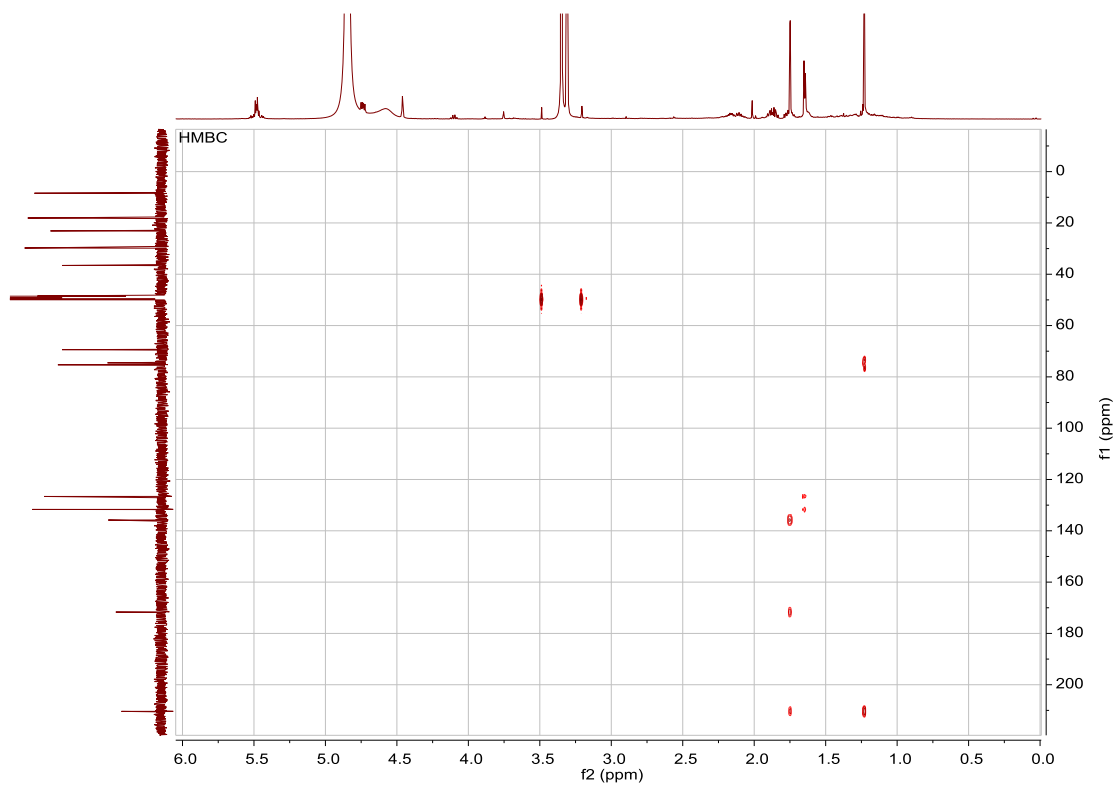

Figure S6. HMBC spectrum (CD<sub>3</sub>OD, 500 MHz <sup>1</sup>H and 125 MHz <sup>13</sup>C) of compound 1.

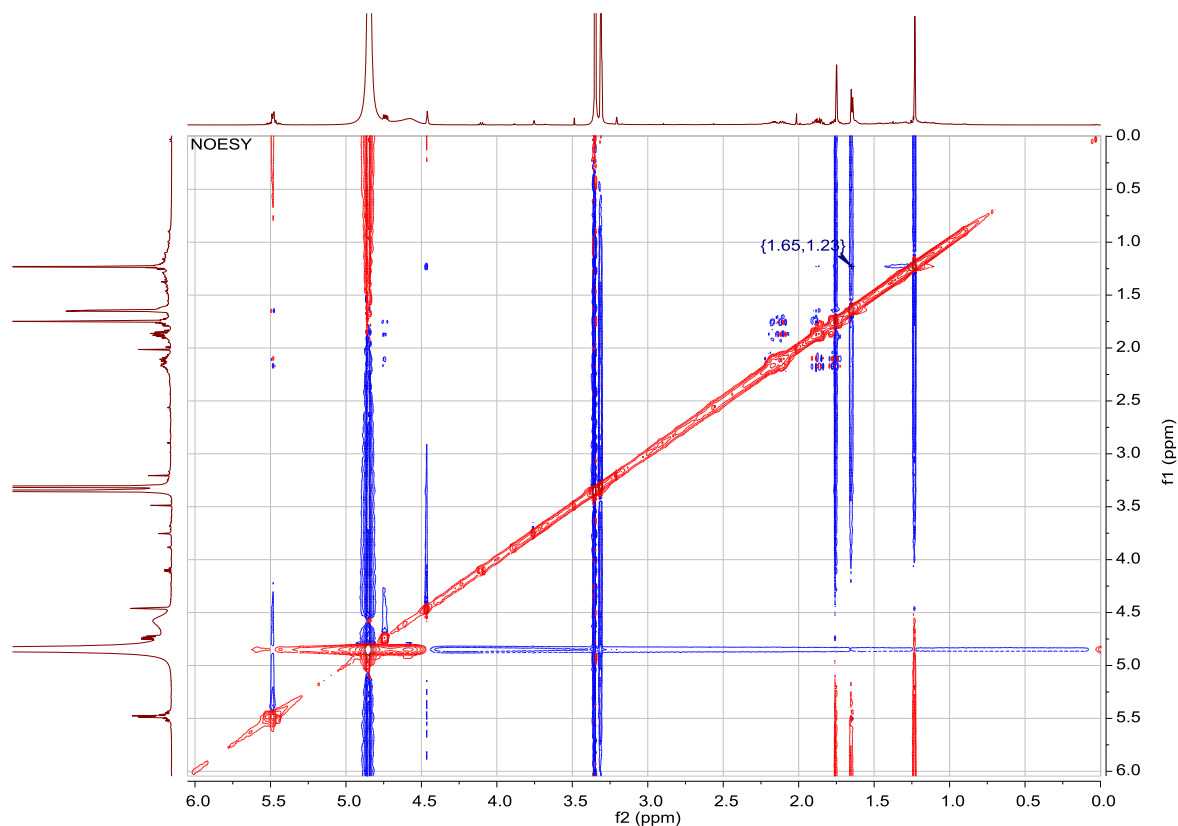

Figure S7. NOESY spectrum ( $\text{CD}_3\text{OD}$ , 500 MHz) of compound 1.

Text S8. ITS rDNA gene sequence from strain HPQJ-34.

TCCGTAGGTGGAACCTGCGGAGGGATCATTACCGAGTTTACAACCTCCCAAACCC  
 CAATGTGAACGTTACCAATCTGTTGCCTCGGCGGGATTCTCTTGCCCCGGGCGC  
 GTCGCAGCCCCGGATCCCATGGCGCCCCGCGGAGGACCAACTCCAAACTCTTTT  
 TTCTCTCCGTCGCGGCTCCCGTCGCGGCTCTGTTTTATTTTTGCTCTGAGCCTTC  
 TCGGCGACCCTAGCGGGCGTCTCGAAAATGAATCAAACTTTCAACAACGGATC  
 TCTTGGTTCTGGCATCGATGAAGAACGCAGCGAAATGCGATAAGTAATGTGAAT  
 TGCAGAATTCAGTGAATCATCGAATCTTTGAACGCACATTGCGCCCCGCCAGTAT  
 TCTGGCGGGCATGCCTGTCCGAGCGTCATTTCAACCCTCGAACCCCTCCGGGGG  
 GTCGGCGTTGGGGATCGGCCCTCACCGGGCCGCCCCGAAATACAGTGGCGGT  
 CTCGCCGAGCCTTTCATGCGCAGTAGTTTGCACACTCGCACCCGGGAGCGCGGC  
 GCGGCCACAGCCGTAAAACACCCCAAATTTTCTGAAATGTTGACCTCGGATCAG  
 GTAGGAATACCCGCTGAACTTAAGCATATCAATAAGCGGAAGAA

**Text S9.** Computational molecular model coordinates for an energy minimized conformer of compound **1**.

HEADER

REMARK Spartan '10 exported M0001

|        |    |   |     |      |        |        |        |
|--------|----|---|-----|------|--------|--------|--------|
| HETATM | 1  | C | UNK | 0001 | -1.637 | -1.053 | 0.131  |
| HETATM | 2  | C | UNK | 0001 | -0.687 | -0.037 | -0.488 |
| HETATM | 3  | C | UNK | 0001 | -1.230 | 1.170  | -0.597 |
| HETATM | 4  | C | UNK | 0001 | -2.600 | 1.142  | -0.015 |
| HETATM | 5  | C | UNK | 0001 | -2.773 | -0.191 | 0.725  |
| HETATM | 6  | O | UNK | 0001 | -3.403 | 2.017  | -0.086 |
| HETATM | 7  | C | UNK | 0001 | -0.694 | 2.436  | -1.193 |
| HETATM | 8  | O | UNK | 0001 | -2.193 | -1.884 | -0.854 |
| HETATM | 9  | C | UNK | 0001 | -2.587 | 0.056  | 2.220  |
| HETATM | 10 | C | UNK | 0001 | 0.690  | -0.465 | -0.926 |
| HETATM | 11 | C | UNK | 0001 | 1.707  | -0.333 | 0.213  |
| HETATM | 12 | C | UNK | 0001 | 3.132  | -0.750 | -0.181 |
| HETATM | 13 | C | UNK | 0001 | 4.099  | -0.585 | 0.962  |
| HETATM | 14 | O | UNK | 0001 | 0.571  | -1.806 | -1.366 |
| HETATM | 15 | C | UNK | 0001 | 5.146  | 0.218  | 1.041  |
| HETATM | 16 | C | UNK | 0001 | 5.667  | 1.184  | 0.012  |
| HETATM | 17 | H | UNK | 0001 | -1.148 | -1.658 | 0.887  |
| HETATM | 18 | H | UNK | 0001 | 0.229  | 2.281  | -1.740 |
| HETATM | 19 | H | UNK | 0001 | -1.429 | 2.863  | -1.866 |
| HETATM | 20 | H | UNK | 0001 | -0.509 | 3.173  | -0.418 |
| HETATM | 21 | H | UNK | 0001 | -1.484 | -2.303 | -1.327 |
| HETATM | 22 | H | UNK | 0001 | -3.353 | 0.738  | 2.567  |
| HETATM | 23 | H | UNK | 0001 | -2.690 | -0.881 | 2.754  |
| HETATM | 24 | H | UNK | 0001 | -1.614 | 0.483  | 2.439  |
| HETATM | 25 | H | UNK | 0001 | 1.009  | 0.153  | -1.760 |
| HETATM | 26 | H | UNK | 0001 | 1.718  | 0.702  | 0.541  |
| HETATM | 27 | H | UNK | 0001 | 1.371  | -0.931 | 1.055  |
| HETATM | 28 | H | UNK | 0001 | 3.133  | -1.798 | -0.475 |
| HETATM | 29 | H | UNK | 0001 | 3.451  | -0.179 | -1.047 |
| HETATM | 30 | H | UNK | 0001 | 3.886  | -1.208 | 1.818  |
| HETATM | 31 | H | UNK | 0001 | 1.364  | -2.080 | -1.806 |
| HETATM | 32 | H | UNK | 0001 | 5.716  | 0.192  | 1.956  |
| HETATM | 33 | H | UNK | 0001 | 6.685  | 0.927  | -0.268 |
| HETATM | 34 | H | UNK | 0001 | 5.070  | 1.210  | -0.890 |
| HETATM | 35 | H | UNK | 0001 | 5.696  | 2.191  | 0.421  |
| HETATM | 36 | O | UNK | 0001 | -4.031 | -0.751 | 0.557  |



**Text S10.** Computational molecular model coordinates for an energy minimized conformer of compound 5.

HEADER

REMARK Spartan '10 exported M0001

|        |    |   |     |      |        |        |        |
|--------|----|---|-----|------|--------|--------|--------|
| HETATM | 1  | C | UNK | 0001 | -1.879 | -1.202 | 0.182  |
| HETATM | 2  | C | UNK | 0001 | -0.933 | -0.161 | -0.408 |
| HETATM | 3  | C | UNK | 0001 | -1.443 | 1.067  | -0.395 |
| HETATM | 4  | C | UNK | 0001 | -2.783 | 1.036  | 0.240  |
| HETATM | 5  | C | UNK | 0001 | -3.124 | -0.403 | 0.589  |
| HETATM | 6  | O | UNK | 0001 | -3.467 | 1.989  | 0.459  |
| HETATM | 7  | C | UNK | 0001 | -0.868 | 2.370  | -0.866 |
| HETATM | 8  | O | UNK | 0001 | -2.252 | -2.186 | -0.741 |
| HETATM | 9  | C | UNK | 0001 | -3.551 | -0.554 | 2.049  |
| HETATM | 10 | C | UNK | 0001 | 0.456  | -0.536 | -0.868 |
| HETATM | 11 | C | UNK | 0001 | 1.495  | -0.240 | 0.222  |
| HETATM | 12 | C | UNK | 0001 | 2.935  | -0.575 | -0.192 |
| HETATM | 13 | C | UNK | 0001 | 3.920  | -0.255 | 0.902  |
| HETATM | 14 | O | UNK | 0001 | 0.446  | -1.912 | -1.198 |
| HETATM | 15 | C | UNK | 0001 | 4.901  | 0.632  | 0.889  |
| HETATM | 16 | C | UNK | 0001 | 5.310  | 1.561  | -0.221 |
| HETATM | 17 | H | UNK | 0001 | -1.413 | -1.669 | 1.048  |
| HETATM | 18 | H | UNK | 0001 | -3.938 | -0.713 | -0.058 |
| HETATM | 19 | H | UNK | 0001 | 0.037  | 2.238  | -1.448 |
| HETATM | 20 | H | UNK | 0001 | -1.595 | 2.896  | -1.473 |
| HETATM | 21 | H | UNK | 0001 | -0.638 | 3.012  | -0.021 |
| HETATM | 22 | H | UNK | 0001 | -1.463 | -2.594 | -1.074 |
| HETATM | 23 | H | UNK | 0001 | -4.402 | 0.082  | 2.258  |
| HETATM | 24 | H | UNK | 0001 | -3.826 | -1.581 | 2.261  |
| HETATM | 25 | H | UNK | 0001 | -2.749 | -0.272 | 2.725  |
| HETATM | 26 | H | UNK | 0001 | 0.701  | 0.038  | -1.757 |
| HETATM | 27 | H | UNK | 0001 | 1.436  | 0.812  | 0.480  |
| HETATM | 28 | H | UNK | 0001 | 1.230  | -0.801 | 1.114  |
| HETATM | 29 | H | UNK | 0001 | 3.011  | -1.639 | -0.412 |
| HETATM | 30 | H | UNK | 0001 | 3.183  | -0.046 | -1.106 |
| HETATM | 31 | H | UNK | 0001 | 3.784  | -0.829 | 1.805  |
| HETATM | 32 | H | UNK | 0001 | 1.235  | -2.141 | -1.668 |
| HETATM | 33 | H | UNK | 0001 | 5.498  | 0.715  | 1.783  |
| HETATM | 34 | H | UNK | 0001 | 6.337  | 1.367  | -0.519 |
| HETATM | 35 | H | UNK | 0001 | 4.687  | 1.475  | -1.102 |
| HETATM | 36 | H | UNK | 0001 | 5.269  | 2.593  | 0.116  |



|        |    |    |    |    |    |
|--------|----|----|----|----|----|
| CONECT | 1  | 17 | 2  | 5  | 8  |
| CONECT | 2  | 1  | 3  | 10 |    |
| CONECT | 3  | 2  | 4  | 7  |    |
| CONECT | 4  | 3  | 5  | 6  |    |
| CONECT | 5  | 4  | 1  | 9  | 18 |
| CONECT | 6  | 4  |    |    |    |
| CONECT | 7  | 3  | 19 | 20 | 21 |
| CONECT | 8  | 1  | 22 |    |    |
| CONECT | 9  | 5  | 23 | 24 | 25 |
| CONECT | 10 | 2  | 11 | 14 | 26 |
| CONECT | 11 | 10 | 12 | 27 | 28 |
| CONECT | 12 | 11 | 13 | 29 | 30 |
| CONECT | 13 | 12 | 15 | 31 |    |
| CONECT | 14 | 10 | 32 |    |    |
| CONECT | 15 | 13 | 16 | 33 |    |
| CONECT | 16 | 15 | 34 | 35 | 36 |
| CONECT | 17 | 1  |    |    |    |
| CONECT | 18 | 5  |    |    |    |
| CONECT | 19 | 7  |    |    |    |
| CONECT | 20 | 7  |    |    |    |
| CONECT | 21 | 7  |    |    |    |
| CONECT | 22 | 8  |    |    |    |
| CONECT | 23 | 9  |    |    |    |
| CONECT | 24 | 9  |    |    |    |
| CONECT | 25 | 9  |    |    |    |
| CONECT | 26 | 10 |    |    |    |
| CONECT | 27 | 11 |    |    |    |
| CONECT | 28 | 11 |    |    |    |
| CONECT | 29 | 12 |    |    |    |
| CONECT | 30 | 12 |    |    |    |
| CONECT | 31 | 13 |    |    |    |
| CONECT | 32 | 14 |    |    |    |
| CONECT | 33 | 15 |    |    |    |
| CONECT | 34 | 16 |    |    |    |
| CONECT | 35 | 16 |    |    |    |
| CONECT | 36 | 16 |    |    |    |

END

**Table S11.** Comparison of the NMR data of compound **1**<sup>a</sup> and **5**<sup>b</sup>

| Position | $\delta_c$ , type.    | $\delta_H$ , mult. (J in Hz)           |                       |
|----------|-----------------------|----------------------------------------|-----------------------|
|          |                       | <b>1</b>                               | <b>5</b>              |
| 1        | 210.4, C              |                                        | 210.3, C              |
| 2        | 135.8, C              |                                        | 136.4, C              |
| 3        | 171.7, C              |                                        | 173.5, C              |
| 4        | 75.3, CH              | 4.49, d (1.0)                          | 77.6, CH              |
| 5        | 74.5, C               |                                        | 50.9, CH              |
| 6        | 8.4, CH <sub>3</sub>  | 1.75, d (1.0)                          | 8.3, CH <sub>3</sub>  |
| 7        | 23.1, CH <sub>3</sub> | 1.23, s                                | 13.8, CH <sub>3</sub> |
| 1'       | 69.4, CH              | 4.72, dd (8.6, 4.8)                    | 69.7, CH              |
| 2'       | 36.6, CH <sub>2</sub> | 1.86, dtd (14.2, 8.6, 5.5),<br>1.76, m | 36.9, CH <sub>2</sub> |
| 3'       | 29.8, CH <sub>2</sub> | 2.12, m                                | 29.8, CH <sub>2</sub> |
| 4'       | 131.6, CH             | 5.49, m                                | 131.7, CH             |
| 5'       | 126.7, CH             | 5.48, m                                | 126.6, CH             |
| 6'       | 18.1, CH <sub>3</sub> | 1.64, d (4.8)                          | 18.1, CH <sub>3</sub> |

<sup>a</sup> Isolated in this study; "NMR spectra were obtained at 500 MHz for <sup>1</sup>H NMR and 125 MHz for <sup>13</sup>C NMR on a Bruker AVANCE-500 spectrometer. Chemical shifts ( $\delta$ ) are referenced to the residual solvent peaks of CD<sub>3</sub>OD ( $\delta_H$  3.31 and  $\delta_c$  49.0) and given in ppm".

<sup>b</sup> Not isolated in this study; "... in CD<sub>3</sub>OD. Data were recorded on a Bruker Avance 600 spectrometer; chemical shifts ( $\delta$ ) are given in parts per million with references to the center peak of CD<sub>3</sub>OD with  $\delta$  3.30 for <sup>1</sup>H and  $\delta$  49.0 for <sup>13</sup>C." from manuscript reference 19 [Lin, S.; Shi, T.; Chen, K. Y.; Zhang, Z. X.; Shan, L.; Shen, Y. H.; Zhang, W. D. Cyclopicillone, a unique cyclopentenone from the cultures of *Penicillium decumbens*. *Chem. Commun.* **2011**, 47, 10413–10418.].
